# Supplementary material for: MicroRNA-22 Inhibits the Apoptosis of Vascular Smooth Muscle Cell by Targeting p38MAPKα in Vascular Remodeling of Aortic Dissection
Source: PubMed Central journal article supplement — Mol Ther Nucleic Acids. 2020 Aug 25;22:1051–62. doi: 10.1016/j.omtn.2020.08.018 (PMC7691156; doi:10.1016/j.omtn.2020.08.018), 2020-08-25
Supplement: mmc1.pdf [file mmc1.pdf]

OMTN, Volume 22

## Supplemental Information

### **MicroRNA-22 Inhibits the Apoptosis of Vascular Smooth Muscle Cell by Targeting p38MAPK $\alpha$ in Vascular Remodeling of Aortic Dissection**

**Yu Xiao, Yudong Sun, Xiang Ma, Chen Wang, Lei Zhang, Jiannan Wang, Guokun Wang, Zhenjiang Li, Wen Tian, Zhiqing Zhao, Qing Jing, Jian Zhou, and Zaiping Jing**

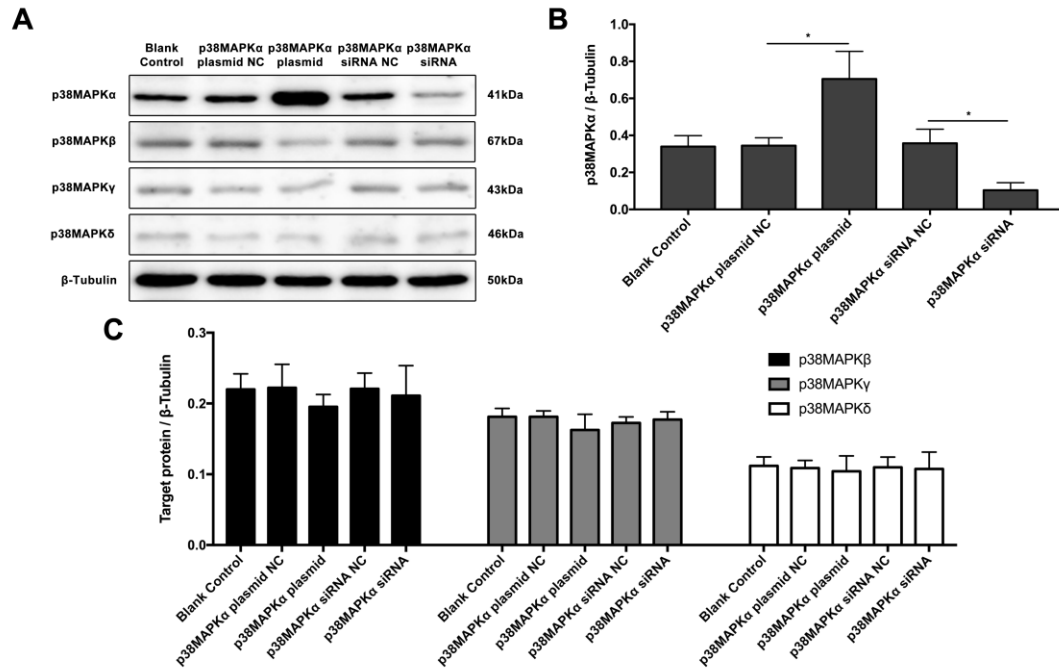

**Figure S1 The plasmid and siRNA specifically affected p38MAPKα's expression.**

(A) Representative western blotting images of the HASMCs with the treatment of p38MAPKα's plasmid or siRNA. (B) Western blotting results showed that p38MAPKα plasmid can obviously increase p38MAPKα's expression. Meanwhile, the p38MAPKα siRNA can significantly inhibit p38MAPKα's expression. (C) Quantitative measurements of p38MAPK family members level, showing specifically interfering effect of p38MAPKα's plasmid and siRNA (n=5 per group). Data were represented as mean ±SD. The western blotting experiment was performed thrice. \*P < 0.05

**A**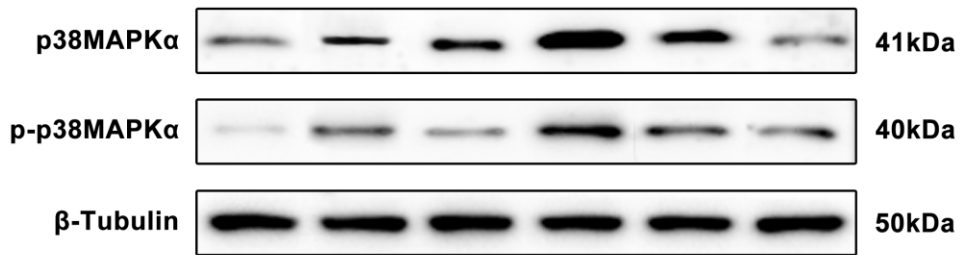**B**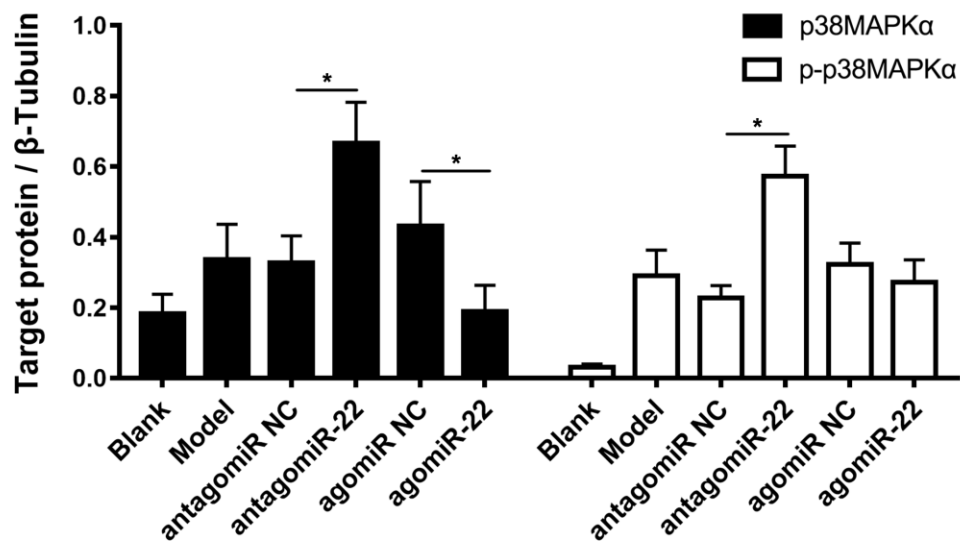

**Figure S2 The effect of miR-22 on the expression on p38MAPKα and phosphorylation level of p38MAPKα in vivo.**

(A) Representative western blotting images of the mice aorta with the treatment of interfering miR-22. (B) Quantitative analysis showing significantly higher p38MAPKα and p38MAPKα phosphorylation level in mice aorta of antagomiR-22 group when compared with the antagomiR-NC group (n=5 per group). The p38MAPKα levels were lower in agomiR-22 group than agomiR-NC group (n=5 per group). However, the phosphorylation level of p38MAPKα didn't significantly change in agomiR-22 group when compared with the agomiR-NC group (n=5 per group). Data were represented as mean ± SD. The western blotting experiment was performed thrice. \*P < 0.05
